# Supplementary material for: Human Campylobacteriosis Cases Traceable to Chicken Meat—Evidence for Disseminated Outbreaks in Finland
Source: Pathogens. 2020 Oct 22;9(11):868. doi: 10.3390/pathogens9110868 (PMC7690634; doi:10.3390/pathogens9110868)
Supplement: Supplementary file 1 [file pathogens-09-00868-s001.xlsx]

## Sheet: Sheet1
File	Day	Month	Year	Source	Location	ST	CC	Ppclade	L1	L2	L3	Accession_project	Reference
3656	24	6	2014	Chicken	N	227	206	21	6	10	5	PRJEB27020	Rossi et al 2018
4383	17	7	2014	Chicken	N	19	21	20	16	13	8	PRJEB27020	Rossi et al 2018
5088	15	8	2014	Chicken	F	122	206	4	33	27	19	PRJEB27020	Rossi et al 2018
5967	10	9	2014	Chicken	42	775	52	54	4	9	4	PRJEB27020	Rossi et al 2018
6032	15	9	2014	Chicken	13	122	206	4	4	9	4	PRJEB27020	Rossi et al 2018
6117	18	9	2014	Chicken	14	122	206	4	4	9	4	PRJEB27020	Rossi et al 2018
6163	18	9	2014	Chicken	7.1	658	658	53	51	36	21	PRJEB27020	Rossi et al 2018
6224	22	9	2014	Chicken	18	122	206	4	4	9	4	PRJEB27020	Rossi et al 2018
6249	23	9	2014	Chicken	19	122	206	4	4	9	4	PRJEB27020	Rossi et al 2018
6289	24	9	2014	Chicken	20	122	206	4	4	9	4	PRJEB27020	Rossi et al 2018
6291	26	9	2014	Chicken	20	21	21	52	21	18	3	PRJEB27020	Rossi et al 2018
DS6691283	18	7	2014	Human	domestic	794	677	12	69	7	2	PRJEB27020	Rossi et al 2018
DS6691284	18	7	2014	Human	domestic	538	45	11	53	38	1	PRJEB27020	Rossi et al 2018
DS6691285	18	7	2014	Human	unknown	354	354	51	38	30	9	PRJEB27020	Rossi et al 2018
DS6691286	19	7	2014	Human	domestic	677	677	10	11	3	2	PRJEB27020	Rossi et al 2018
DS6691287	18	7	2014	Human	unknown	45	45	19	5	2	1	PRJEB27020	Rossi et al 2018
DS6691288	18	7	2014	Human	unknown	794	677	12	70	7	2	PRJEB27020	Rossi et al 2018
DS6691289	17	7	2014	Human	domestic	267	283	3	54	4	1	PRJEB27020	Rossi et al 2018
DS6691290	16	7	2014	Human	domestic	11	45	6	42	5	1	PRJEB27020	Rossi et al 2018
DS6691291	16	7	2014	Human	domestic	45	45	5	25	1	1	PRJEB27020	Rossi et al 2018
DS6691292	17	7	2014	Human	domestic	677	677	50	64	3	2	PRJEB27020	Rossi et al 2018
DS6691293	22	7	2014	Human	domestic	45	45	2	13	6	1	PRJEB27020	Rossi et al 2018
DS6691294	21	7	2014	Human	domestic	677	677	49	57	3	2	PRJEB27020	Rossi et al 2018
DS6691295	20	7	2014	Human	domestic	45	45	5	26	1	1	PRJEB27020	Rossi et al 2018
DS6691296	21	7	2014	Human	unknown	45	45	1	7	2	1	PRJEB27020	Rossi et al 2018
DS6691297	21	7	2014	Human	domestic	45	45	2	2	6	1	PRJEB27020	Rossi et al 2018
DS6691298	21	7	2014	Human	unknown	4067	UA	48	50	35	20	PRJEB27020	Rossi et al 2018
DS6691299	23	7	2014	Human	unknown	45	45	1	7	2	1	PRJEB27020	Rossi et al 2018
DS6691300	24	7	2014	Human	domestic	1080	UA	47	72	22	16	PRJEB27020	Rossi et al 2018
DS6691301	23	7	2014	Human	domestic	267	283	46	48	4	1	PRJEB27020	Rossi et al 2018
DS6691302	24	7	2014	Human	unknown	51	443	45	30	24	17	PRJEB27020	Rossi et al 2018
DS6691303	29	7	2014	Human	unknown	45	45	2	13	6	1	PRJEB27020	Rossi et al 2018
DS6691304	28	7	2014	Human	unknown	1519	21	44	20	17	12	PRJEB27020	Rossi et al 2018
DS6691305	1	8	2014	Human	domestic	45	45	43	23	1	1	PRJEB27020	Rossi et al 2018
DS6691306	30	7	2014	Human	domestic	45	45	2	14	6	1	PRJEB27020	Rossi et al 2018
DS6691307	31	7	2014	Human	domestic	45	45	2	2	6	1	PRJEB27020	Rossi et al 2018
DS6691308	31	7	2014	Human	domestic	19	21	20	16	13	8	PRJEB27020	Rossi et al 2018
DS6691309	2	8	2014	Human	domestic	677	677	42	55	3	2	PRJEB27020	Rossi et al 2018
DS6691310	4	8	2014	Human	domestic	45	45	5	27	1	1	PRJEB27020	Rossi et al 2018
DS6691311	4	8	2014	Human	domestic	45	45	9	19	1	1	PRJEB27020	Rossi et al 2018
DS6691312	4	8	2014	Human	unknown	230	45	18	8	8	1	PRJEB27020	Rossi et al 2018
DS6691313	4	8	2014	Human	domestic	267	283	3	41	4	1	PRJEB27020	Rossi et al 2018
DS6691314	6	8	2014	Human	domestic	45	45	41	18	1	1	PRJEB27020	Rossi et al 2018
DS6691315	6	8	2014	Human	domestic	794	677	12	68	7	2	PRJEB27020	Rossi et al 2018
DS6691316	7	8	2014	Human	unknown	4766	UA	40	34	28	4	PRJEB27020	Rossi et al 2018
DS6691317	11	8	2014	Human	domestic	5	353	39	45	32	15	PRJEB27020	Rossi et al 2018
DS6691318	12	8	2014	Human	unknown	267	283	3	10	4	1	PRJEB27020	Rossi et al 2018
DS6691319	11	8	2014	Human	unknown	267	283	3	10	4	1	PRJEB27020	Rossi et al 2018
DS6691321	15	8	2014	Human	unknown	45	45	5	15	1	1	PRJEB27020	Rossi et al 2018
DS6691322	13	8	2014	Human	domestic	677	677	17	62	3	2	PRJEB27020	Rossi et al 2018
DS6691323	18	8	2014	Human	unknown	1374	UA	38	58	12	7	PRJEB27020	Rossi et al 2018
DS6691324	19	8	2014	Human	unknown	794	677	37	65	7	2	PRJEB27020	Rossi et al 2018
DS6691325	22	8	2014	Human	unknown	45	45	9	22	1	1	PRJEB27020	Rossi et al 2018
DS6691326	25	8	2014	Human	unknown	53	21	36	32	26	3	PRJEB27020	Rossi et al 2018
DS6691327	27	8	2014	Human	unknown	10649	UA	35	52	37	22	PRJEB27020	Rossi et al 2018
DS6691328	26	8	2014	Human	unknown	21	21	8	31	25	3	PRJEB27020	Rossi et al 2018
DS6691329	30	8	2014	Human	domestic	45	45	9	17	1	1	PRJEB27020	Rossi et al 2018
DS6691330	1	9	2014	Human	domestic	7413	UA	34	35	29	23	PRJEB27020	Rossi et al 2018
DS6691331	1	9	2014	Human	unknown	45	45	1	9	2	1	PRJEB27020	Rossi et al 2018
DS6691332	1	9	2014	Human	unknown	45	45	16	3	1	1	PRJEB27020	Rossi et al 2018
DS6691333	17	7	2014	Chicken	12	45	45	2	2	6	1	PRJEB27020	Rossi et al 2018
DS6691335	16	7	2014	Chicken	14	45	45	33	28	1	1	PRJEB27020	Rossi et al 2018
DS6691336	18	7	2014	Chicken	13	2219	45	15	43	5	1	PRJEB27020	Rossi et al 2018
DS6691337	21	7	2014	Chicken	13	2219	45	15	43	5	1	PRJEB27020	Rossi et al 2018
DS6691338	23	7	2014	Chicken	16	11	45	6	1	5	1	PRJEB27020	Rossi et al 2018
DS6691339	21	7	2014	Chicken	17	11	45	6	1	5	1	PRJEB27020	Rossi et al 2018
DS6691340	22	7	2014	Chicken	20	677	677	10	56	3	2	PRJEB27020	Rossi et al 2018
DS6691341	23	7	2014	Chicken	21	230	45	18	8	8	1	PRJEB27020	Rossi et al 2018
DS6691342	28	7	2014	Chicken	22	11	45	7	44	31	1	PRJEB27020	Rossi et al 2018
DS6691343	28	7	2014	Chicken	22	11	45	7	44	31	1	PRJEB27020	Rossi et al 2018
DS6691344	28	7	2014	Chicken	23	267	283	3	10	4	1	PRJEB27020	Rossi et al 2018
DS6691345	28	7	2014	Chicken	24	45	45	1	9	2	1	PRJEB27020	Rossi et al 2018
DS6691346	29	7	2014	Chicken	25	45	45	1	5	2	1	PRJEB27020	Rossi et al 2018
DS6691347	30	7	2014	Chicken	26	230	45	32	40	8	1	PRJEB27020	Rossi et al 2018
DS6691348	31	7	2014	Chicken	27	677	677	17	62	3	2	PRJEB27020	Rossi et al 2018
DS6691349	11	8	2014	Chicken	28	11	45	7	44	31	1	PRJEB27020	Rossi et al 2018
DS6691350	11	8	2014	Chicken	29	468	UA	31	71	21	2	PRJEB27020	Rossi et al 2018
DS6691351	11	8	2014	Chicken	3	538	45	11	53	38	1	PRJEB27020	Rossi et al 2018
DS6691352	12	8	2014	Chicken	4	267	283	3	10	4	1	PRJEB27020	Rossi et al 2018
DS6691353	13	8	2014	Chicken	6	677	677	30	63	3	2	PRJEB27020	Rossi et al 2018
DS6691354	14	8	2014	Chicken	31	21	21	8	31	25	3	PRJEB27020	Rossi et al 2018
DS6691359	25	6	2014	Chicken	3	45	45	14	29	23	1	PRJEB27020	Rossi et al 2018
DS6691360	25	6	2014	Chicken	4	5559	UA	29	60	15	11	PRJEB27020	Rossi et al 2018
DS6691361	27	6	2014	Chicken	6	8423	UA	28	67	20	14	PRJEB27020	Rossi et al 2018
DS6691362	24	6	2014	Chicken	5	227	206	21	6	10	5	PRJEB27020	Rossi et al 2018
DS6691363	4	7	2014	Chicken	8	677	677	10	11	3	2	PRJEB27020	Rossi et al 2018
DS6691364	3	7	2014	Chicken	9	45	45	1	36	2	1	PRJEB27020	Rossi et al 2018
DS6691365	10	7	2014	Chicken	10	45	45	1	39	2	1	PRJEB27020	Rossi et al 2018
DS6691366	14	7	2014	Chicken	11	45	45	19	46	2	1	PRJEB27020	Rossi et al 2018
DS6691367	18	8	2014	Chicken	34	45	45	1	37	2	1	PRJEB27020	Rossi et al 2018
DS6691368	25	8	2014	Chicken	36	45	45	14	29	23	1	PRJEB27020	Rossi et al 2018
DS6691369	27	8	2014	Chicken	37	5543	UA	27	47	33	18	PRJEB27020	Rossi et al 2018
DS6691370	20	8	2014	Chicken	38	383	283	13	49	34	1	PRJEB27020	Rossi et al 2018
DS6691371	22	8	2014	Chicken	39	45	45	1	37	2	1	PRJEB27020	Rossi et al 2018
DS6691372	1	9	2014	Chicken	40	42	42	26	59	14	10	PRJEB27020	Rossi et al 2018
DS6691373	5	9	2014	Chicken	41	8426	1287	25	12	11	6	PRJEB27020	Rossi et al 2018
DS6691374	19	9	2014	Chicken	46	45	45	16	3	1	1	PRJEB27020	Rossi et al 2018
DS6691375	30	9	2014	Chicken	51	45	45	24	24	1	1	PRJEB27020	Rossi et al 2018
DS6691376	21	7	2014	Chicken	18	137	45	23	61	16	1	PRJEB27020	Rossi et al 2018
FIAR-857	25	6	2014	Chicken	2	538	45	11	53	38	1	PubMLST (id: 106378-106382
FIAR-867	3	7	2014	Chicken	7	11	45	6	1	5	1	PubMLST (id: 106378-106382
FIAR-899	20	8	2014	Chicken	35	21	21	8	31	25	3	PubMLST (id: 106378-106382
FIAR-902	27	8	2014	Chicken	5	1294	UA	22	66	19	13	PubMLST (id: 106378-106382
FIAR-904	22	8	2014	Chicken	38	383	283	13	49	34	1	PubMLST (id: 106378-106382
References
Mirko Rossi, Mickael Santos Da Silva, Bruno Filipe Ribeiro-Gonçalves, Diogo Nuno Silva, Miguel Paulo Machado, Mónica Oleastro, … João André Carriço. (2018). INNUENDO whole genome and core genome MLST schemas and datasets for Campylobacter jejuni (Version 1.0) [Data set]. Zenodo. http://doi.org/10.5281/zenodo.1322564
